# Supplementary material for: The effect of nanonization on poorly water soluble glibenclamide using a liquid anti-solvent precipitation technique: aqueous solubility, in vitro and in vivo study
Source: Royal Society of Chemistry journal article supplement (doi:10.1039/c5ra12678a), 2015-01-01
Supplement: c5ra12678a1.pdf [file c5ra12678a1.pdf]

## Supplementary Data

**Table 1: Study and Selection of optimal Solvent to Anti-solvent ratios.**

| Code           | Solvent(ml) | Anti-solvent(ml) | GLB(mg/ml) | Particle size(nm)* | PDI*        |
|----------------|-------------|------------------|------------|--------------------|-------------|
| <b>05:05</b>   | 05          | 05               | 50         | 4931.1±122.2       | 0.498±0.012 |
| <b>4.5:5.5</b> | 4.5         | 5.5              | 50         | 4483.3±98.5        | 0.635±0.023 |
| <b>04:06</b>   | 04          | 06               | 50         | 3621.8±130.8       | 0.674±0.014 |
| <b>3.5:6.5</b> | 3.5         | 6.5              | 50         | 2815.5±142.1       | 0.587±0.025 |
| <b>03:07</b>   | 03          | 07               | 50         | 3407.2±110.6       | 0.541±0.052 |
| <b>2.5:7.5</b> | 2.5         | 7.5              | 50         | 4197.6±95.4        | 0.576±0.031 |
| <b>02:08</b>   | 02          | 08               | 50         | 4771.3±116.2       | 0.488±0.046 |
| <b>1.5:8.5</b> | 1.5         | 8.5              | 50         | 4853.7137.6        | 0.621±0.031 |
| <b>01:09</b>   | 01          | 09               | 50         | 5192.3±122.4       | 0.557±0.048 |

\*n=3

**Table 2: Study and Selection of optimal drug concentration.**

| Drug concentration (mg/ml) | Solvent:anti-solvent (ml/ml) | Particle size(nm)* | PDI*        |
|----------------------------|------------------------------|--------------------|-------------|
| <b>10</b>                  | 3.5:6.5                      | 2815.2±24.6        | 0.437±0.012 |
| <b>20</b>                  | 3.5:6.5                      | 2784.6±22.1        | 0.396±0.014 |
| <b>30</b>                  | 3.5:6.5                      | 2621.3±30.7        | 0.413±0.022 |
| <b>40</b>                  | 3.5:6.5                      | 2276.4±26.5        | 0.38±0.013  |
| <b>50</b>                  | 3.5:6.5                      | 2891.9±24.2        | 0.402±0.011 |
| <b>60</b>                  | 3.5:6.5                      | 3089.3±32.9        | 0.363±0.022 |

\*n=3

**Table 3: Stabilization GLB nanosuspension by HPMC K15M/Lactose.**

| Formulation code | Solvent:anti-solvent(ml/ml) | GLB (mg/ml) | HPMC K15M % w/v | Lactose % w/v | Particle size(nm)* | PDI*        |
|------------------|-----------------------------|-------------|-----------------|---------------|--------------------|-------------|
| GD-H0.1          | 3.5:6.5                     | 40          | 0.1             | 0             | 1263.3±30.4        | 0.517±0.013 |
| GD-H0.2          | 3.5:6.5                     | 40          | 0.2             | 0             | 459.4±27.3         | 0.208±0.011 |
| GD-H0.3          | 3.5:6.5                     | 40          | 0.3             | 0             | 136.1±17.9         | 0.187±0.019 |
| GD-H0.4          | 3.5:6.5                     | 40          | 0.4             | 0             | 604.9±26.6         | 0.321±0.018 |
| GD-H0.5          | 3.5:6.5                     | 40          | 0.5             | 0             | 1085.7±29.3        | 0.334±0.019 |
| GD-H0.6          | 3.5:6.5                     | 40          | 0.6             | 0             | 1710.3±34.6        | 0.446±0.009 |
| GD-L0.1          | 3.5:6.5                     | 40          | 0               | 0.1           | 1933.5±33.4        | 0.407±0.01  |
| GD-L0.2          | 3.5:6.5                     | 40          | 0               | 0.2           | 1439.4±29.3        | 0.438±0.016 |
| GD-L0.3          | 3.5:6.5                     | 40          | 0               | 0.3           | 705.6±25.1         | 0.297±0.015 |
| GD-L0.4          | 3.5:6.5                     | 40          | 0               | 0.4           | 352.9±20.8         | 0.31±0.018  |
| GD-L0.5          | 3.5:6.5                     | 40          | 0               | 0.5           | 866.2±32.3         | 0.493±0.017 |
| GD-L0.6          | 3.5:6.5                     | 40          | 0               | 0.6           | 1353.4±35.4        | 0.582±0.023 |

\*n=3

**Table 3: Lyophilization of GLB NS.**

| <b>Formulation code</b> | <b>Solvent:anti-solvent(ml/ml)</b> | <b>GLB (mg/ml)</b> | <b>HPMC K15M % w/v</b> | <b>Lactose % w/v</b> | <b>Mannitol %w/v</b> | <b>Particle size(nm)*</b> | <b>PDI*</b> | <b>Dispersability grade*</b> |
|-------------------------|------------------------------------|--------------------|------------------------|----------------------|----------------------|---------------------------|-------------|------------------------------|
| GD-H0.3a                | 3.5:6.5                            | 40                 | 0.3                    | 0                    | 0                    | 838.3±18.3                | 0.218±0.015 | Grade C                      |
| GD-H0.3b                | 3.5:6.5                            | 40                 | 0.3                    | 0                    | 1                    | 644.7±22.8                | 0.234±0.013 | Grade C                      |
| GD-H0.3c                | 3.5:6.5                            | 40                 | 0.3                    | 0                    | 2                    | 356.1±23.1                | 0.272±0.017 | Grade C                      |
| GD-H0.3d                | 3.5:6.5                            | 40                 | 0.3                    | 0                    | 3                    | 168.6±19.4                | 0.158±0.008 | Grade A                      |
| GD-H0.3e                | 3.5:6.5                            | 40                 | 0.3                    | 0                    | 4                    | 196.9±20.1                | 0.189±0.015 | Grade A                      |
| GD-H0.3f                | 3.5:6.5                            | 40                 | 0.3                    | 0                    | 5                    | 228.7±46.3                | 0.188±0.009 | Grade A                      |
| GD-L0.4a                | 3.5:6.5                            | 40                 | 0                      | 0.4                  | 0                    | 959.8±26.1                | 0.321±0.016 | Grade C                      |
| GD-L0.4b                | 3.5:6.5                            | 40                 | 0                      | 0.4                  | 1                    | 877.3±17.7                | 0.348±0.015 | Grade C                      |
| GD-L0.4c                | 3.5:6.5                            | 40                 | 0                      | 0.4                  | 2                    | 891.5±15.4                | 0.389±0.012 | Grade C                      |
| GD-L0.4d                | 3.5:6.5                            | 40                 | 0                      | 0.4                  | 3                    | 613.7±25.5                | 0.297±0.011 | Grade B                      |
| GD-L0.4e                | 3.5:6.5                            | 40                 | 0                      | 0.4                  | 4                    | 525.3±23.7                | 0.284±0.014 | Grade A                      |
| GD-L0.4f                | 3.5:6.5                            | 40                 | 0                      | 0.4                  | 5                    | 342.2±26.9                | 0.168±0.009 | Grade A                      |

**\*n=3**
